# Supplementary material
Source: HighWire-hosted journal article supplement (https://www.cmaj.ca/content/suppl/2012/11/26/cmaj.120951)
Supplement: grape-bailey-1-at.pdf [file grape-bailey-1-at.pdf]

**Appendix 1: Grapefruit Interacting Drugs and Associated Oral Bioavailability, Adverse Event(s), Risk Ranking and Potential Alternative Medications**

| <b>Interacting Drugs</b>     | <b>Innate Oral Bioavailability*</b> | <b>Dose-Related Drug Adverse Event(s)</b> | <b>Predicted Interaction Risk Rank **</b> | <b>Potential Alternative Medication(s)***</b>       |
|------------------------------|-------------------------------------|-------------------------------------------|-------------------------------------------|-----------------------------------------------------|
| <b>Anti-Cancer Agents</b>    |                                     |                                           |                                           |                                                     |
| crizotinib                   | intermediate                        | torsade de pointes, myelotoxicity         | high                                      |                                                     |
| cyclophosphamide             | high                                | loss of efficacy                          | intermediate                              |                                                     |
| dasatinib                    | not known                           | torsade de pointes, myelotoxicity         | high                                      | <i>imatinib</i>                                     |
| erlotinib                    | intermediate                        | myelotoxicity                             | high                                      |                                                     |
| everolimus                   | low                                 | myelotoxicity, nephrotoxicity             | high                                      |                                                     |
| imatinib                     | high                                | myelotoxicity                             | intermediate                              |                                                     |
| lapatinib                    | incomplete                          | torsade de pointes, myelotoxicity         | high                                      |                                                     |
| nilotinib                    | intermediate                        | torsade de pointes, myelotoxicity         | high                                      | <i>imatinib</i>                                     |
| pazopanib                    | incomplete                          | torsade de pointes, myelotoxicity         | high                                      | <i>sorafenib</i>                                    |
| sorafenib                    | intermediate                        | myelotoxicity                             | intermediate                              |                                                     |
| sunitinib                    | not known                           | torsade de pointes, myelotoxicity         | high                                      | <i>sorafenib</i>                                    |
| vandetanib                   | not known                           | torsade de pointes, myelotoxicity         | high                                      |                                                     |
| venurafenib                  | not known                           | torsade de pointes, myelotoxicity         | high                                      |                                                     |
| <b>Anti-Diabetic Agents</b>  |                                     |                                           |                                           |                                                     |
| repaglinide                  | intermediate                        | hypoglycemia                              | intermediate                              | glyburide, <i>metformin</i> ,<br><i>sitagliptin</i> |
| saxagliptin                  | intermediate                        | hypoglycemia                              | intermediate                              | glyburide, <i>metformin</i> ,<br><i>sitagliptin</i> |
| <b>Anti-Infective Agents</b> |                                     |                                           |                                           |                                                     |
| albendazole                  | low                                 | dizziness, headache, nausea               | intermediate                              |                                                     |
| artemether                   | low                                 | enhanced anti-malarial efficacy           | low                                       |                                                     |
| erythromycin                 | intermediate                        | torsade de pointes                        | high                                      | clarithromycin                                      |
| etravirine                   | not known                           | skin rash                                 | low                                       |                                                     |
| halofantrine                 | low                                 | torsade de pointes                        | very high                                 | <i>doxycycline</i>                                  |
| maraviroc                    | low                                 | postural hypotension, syncope             | very high                                 | <i>enfuvirtide</i>                                  |
| praziquantel                 | low                                 | dizziness, headache, somnolence           | intermediate                              |                                                     |
| primaquine                   | intermediate                        | myelotoxicity                             | high                                      | <i>doxycycline</i>                                  |
| quinine                      | intermediate                        | torsade de pointes                        | high                                      | <i>doxycycline</i>                                  |

|                                 |              |                                    |              |                                                          |
|---------------------------------|--------------|------------------------------------|--------------|----------------------------------------------------------|
| rilpivirine                     | not known    | torsade de pointes                 | high         | <i>nevirapine</i>                                        |
| saquinivir                      | very low     | enhanced HIV efficacy              | low          | amprenavir, indinivir                                    |
| <b>Anti-Inflammatory Agents</b> |              |                                    |              |                                                          |
| budesonide – oral               | intermediate | hyperglycemia, Cushingoid features | intermediate |                                                          |
| colchicine                      | not known    | neutropenia, neuropathy            | intermediate | prednisone, <i>ibuprofen</i>                             |
| methylprednisolone -oral        | intermediate | hyperglycemia, Cushingoid features | intermediate | prednisone                                               |
| <b>Anti-Lipemic Agents</b>      |              |                                    |              |                                                          |
| atorvastatin                    | low          | rhabdomyolysis                     | high         | pravastatin, <i>rosuvastatin</i> ,<br><i>fluvastatin</i> |
| lovastatin                      | very low     | rhabdomyolysis                     | very high    | pravastatin, <i>rosuvastatin</i> ,<br><i>fluvastatin</i> |
| simvastatin                     | very low     | rhabdomyolysis                     | very high    | pravastatin, <i>rosuvastatin</i> ,<br><i>fluvastatin</i> |
| <b>Cardiovascular Agents</b>    |              |                                    |              |                                                          |
| amiodarone                      | intermediate | torsade de pointes                 | high         | <i>sotalol</i>                                           |
| amlodipine                      | high         | hypotension, peripheral edema      | low          |                                                          |
| apixaban                        | intermediate | GI bleeding                        | high         | warfarin                                                 |
| cilostazol                      | not known    | GI bleeding                        | high         | <i>acetylsalicylic acid</i>                              |
| clopidogrel                     | very low     | loss of efficacy                   | high         | <i>acetylsalicylic acid</i>                              |
| dronedarone                     | low          | torsade de pointes                 | very high    | <i>sotalol</i>                                           |
| eplerenone                      | intermediate | hyperkalemia, serious arrhythmias  | high         | <i>spironolactone</i>                                    |
| ergotamine                      | very low     | gangrene, stroke                   | very high    | <i>a triptan class drug</i>                              |
| felodipine                      | low          | hypotension, peripheral edema      | intermediate | amlodipine                                               |
| losartan                        | intermediate | loss of efficacy                   | intermediate |                                                          |
| manidipine                      | low          | hypotension, peripheral edema      | intermediate | amlodipine                                               |
| nicardipine                     | low          | hypotension, peripheral edema      | intermediate | amlodipine                                               |
| nifedipine                      | intermediate | hypotension, peripheral edema      | intermediate | amlodipine                                               |
| nimodipine                      | very low     | hypotension, peripheral edema      | intermediate |                                                          |
| nisoldipine                     | very low     | hypotension, peripheral edema      | intermediate | amlodipine                                               |
| nitrendipine                    | low          | hypotension, peripheral edema      | intermediate | amlodipine                                               |
| propafenone                     | low          | bradycardia, conduction disorders  | intermediate |                                                          |
| quinidine                       | high         | torsade de pointes                 | intermediate |                                                          |

Appendix to: Bailey DG, Dresser G, Arnold JMA. Grapefruit and medication interactions: forbidden fruit or avoidable consequences? *CMAJ* 2012; DOI:10.1503/cmaj.120951.

Copyright © 2013 The Author(s) or their employer(s).

To receive this resource in an accessible format, please contact us at [cmajgroup@cmaj.ca](mailto:cmajgroup@cmaj.ca).

|                   |              |                                                      |              |                                              |
|-------------------|--------------|------------------------------------------------------|--------------|----------------------------------------------|
| rivaroxaban       | high         | GI bleeding                                          | intermediate | warfarin                                     |
| sibutramine       | not known    | hypertension                                         | intermediate |                                              |
| sildenafil        | intermediate | hypotension                                          | intermediate |                                              |
| tadalafil         | intermediate | hypotension                                          | intermediate |                                              |
| ticagrelor        | intermediate | GI or kidney bleeding                                | high         | <i>acetylsalicylic acid</i>                  |
| vardenafil        | intermediate | hypotension                                          | intermediate |                                              |
| verapamil         | intermediate | complete heart block                                 | high         | diltiazem                                    |
| <b>CNS Agents</b> |              |                                                      |              |                                              |
| aprepitant        | intermediate | drowsiness, headache                                 | low          |                                              |
| alfentanil – oral | intermediate | respiratory depression                               | high         | <i>hydromorphone, morphine</i>               |
| bupirone          | very low     | dizziness, sedation                                  | high         | <i>oxazepam, tamazepam</i>                   |
| carbamazepine     | high         | ataxia                                               | low          | <i>phenytoin, clonazepam</i>                 |
| dextromethorphan  | very low     | hallucinations, somnolence                           | high         |                                              |
| diazepam          | low          | sedation                                             | intermediate | <i>alprazolam, oxazepam, tamazepam</i>       |
| fentanyl – oral   | intermediate | respiratory depression                               | high         | <i>hydromorphone, morphine</i>               |
| fluvoxamine       | not known    | adverse change in mood                               | intermediate | <i>citralopram, paroxetine, escitalopram</i> |
| ketamine – oral   | low          | respiratory depression                               | very high    | <i>hydromorphone, morphine</i>               |
| lurasidone        | low          | torsade de pointes, orthostatic hypotension, syncope | very high    | <i>haloperidol, risperidone, olanzapine</i>  |
| methadone         | high         | respiratory depression                               | intermediate |                                              |
| midazolam – oral  | intermediate | sedation                                             | intermediate | <i>alprazolam, lorazepam</i>                 |
| oxycodone         | intermediate | respiratory depression                               | high         | <i>hydromorphone, morphine</i>               |
| pimozide          | intermediate | torsade de pointes                                   | high         | <i>haloperidol, risperidone, olanzapine</i>  |
| quazepam          | intermediate | sedation                                             | low          | <i>alprazolam, oxazepam, temazepam</i>       |
| quetiapine        | very low     | dizziness, somnolence                                | high         | <i>haloperidol, risperidone, olanzapine</i>  |
| sertraline        | intermediate | dizziness, somnolence                                | intermediate | <i>citralopram, paroxetine, escitalopram</i> |
| triazolam         | intermediate | sedation                                             | intermediate | <i>alprazolam, lorazepam</i>                 |
| ziprasidone       | intermediate | torsade de pointes                                   | high         | <i>haloperidol, risperidone</i>              |

|                                 |              |                                 |              |                       |
|---------------------------------|--------------|---------------------------------|--------------|-----------------------|
|                                 |              |                                 |              | <i>olanzapine</i>     |
| <b>Estrogens</b>                |              |                                 |              |                       |
| estradiol                       | low          | breast cancer risk, thrombosis  | intermediate |                       |
| ethinylestradiol                | intermediate | breast cancer risk, thrombosis  | intermediate |                       |
| <b>Gastrointestinal Agents</b>  |              |                                 |              |                       |
| cisapride                       | intermediate | torsade de pointes              | high         | <i>metoclopramide</i> |
| domperidone                     | low          | torsade de pointes              | very high    | <i>metoclopramide</i> |
| <b>Immunosuppressant Agents</b> |              |                                 |              |                       |
| cyclosporine                    | low          | nephrotoxicity                  | high         |                       |
| everolimus                      | low          | myelotoxicity, nephrotoxicity   | high         |                       |
| sirolimus                       | low          | myelotoxicity, nephrotoxicity   | high         |                       |
| tacrolimus                      | low          | nephrotoxicity                  | high         |                       |
| <b>Urinary Tract Agents</b>     |              |                                 |              |                       |
| darifenacin                     | low          | urinary retention, constipation | intermediate |                       |
| fesoterodine                    | intermediate | urinary retention, constipation | intermediate |                       |
| solifenacin                     | high         | torsade de pointes              | intermediate |                       |
| silodosin                       | intermediate | postural hypotension, dizziness | intermediate |                       |
| tamsulosin                      | intermediate | postural hypotension, dizziness | intermediate |                       |

\* Innate oral drug bioavailability is the population average: very low (<10%), low (>10-30%), intermediate (>30 – 70%), high (>70%)

\*\* Predicted Risk Rank is based initially upon the seriousness of the dose-related adverse drug effect and then adjusted dependent upon the innate oral bioavailability of the drug, which is used to determine the potential magnitude of increase in systemic drug concentration (see text). There are four categories of risk ranking: very high, high, intermediate, low. It is recommended for older patients, particularly the elderly, that drugs in the very high or high category that consumption of grapefruit or other interacting citrus fruits should be contraindicated during pharmacotherapy until proven safe or that a suggested alternative non-interacting drug be employed when available.

\*\*\* Potential alternative medication(s) include established or predicted (*italics*) commonly prescribed drugs (Top 100 prescribed in 2011 in Canada) with the same therapeutic indication that have no or minor pharmacokinetic interaction with grapefruit or other interacting citrus fruits.
